# Supplementary material
Source: PubMed Central journal article supplement (PMC4004290)
Supplement: nn5002968_si_001.pdf [file nn5002968_si_001.pdf]

## **Supporting Information**

### **Diamond-Nanogel Embedded Contact Lenses Mediate Lysozyme-Dependent Therapeutic Release**

Ho-Joong Kim,<sup>1,2\*</sup> Kangyi Zhang,<sup>1,2\*</sup> Laura K. Moore,<sup>1</sup> and Dean Ho<sup>1,2,3,4,5,6,7^</sup>

<sup>1</sup>Department of Biomedical Engineering, Northwestern University, Evanston, Illinois, 60208

<sup>2</sup>Division of Oral Biology and Medicine, UCLA School of Dentistry, Los Angeles, California, 90095

<sup>3</sup>Department of Mechanical Engineering, Northwestern University, Evanston, Illinois, 60208

<sup>4</sup>Robert H Lurie Comprehensive Cancer Center, Northwestern University, Chicago, Illinois, 60611

<sup>5</sup>Institute for Biotechnology in Medicine, Northwestern University, Chicago, Illinois, 60611

<sup>6</sup>Current Address: Division of Oral Biology and Medicine and Division of Advanced Prosthodontics, UCLA School of Dentistry, Los Angeles, California, 90095

<sup>7</sup>Current Address: The Jane and Jerry Weintraub Center for Reconstructive Biotechnology, UCLA School of Dentistry, Los Angeles, California, 90095

\*These authors contributed equally to this work

^To whom correspondence should be addressed: [dean.ho@ucla.edu](mailto:dean.ho@ucla.edu)

**Figure S1**

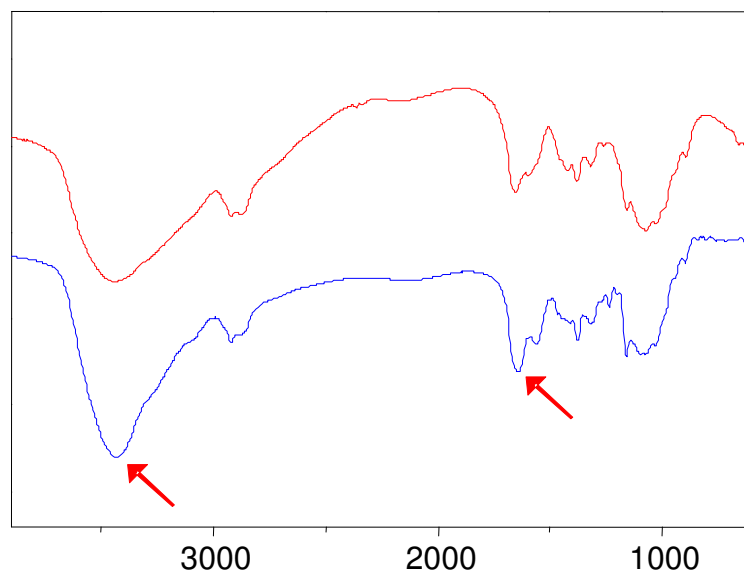

**Figure S1.** FTIR spectra of chitosan (red) and N-acetylated chitosan (blue). Red arrows indicate the presence of secondary amide bonds in N-acetyl group.

**Figure S2**

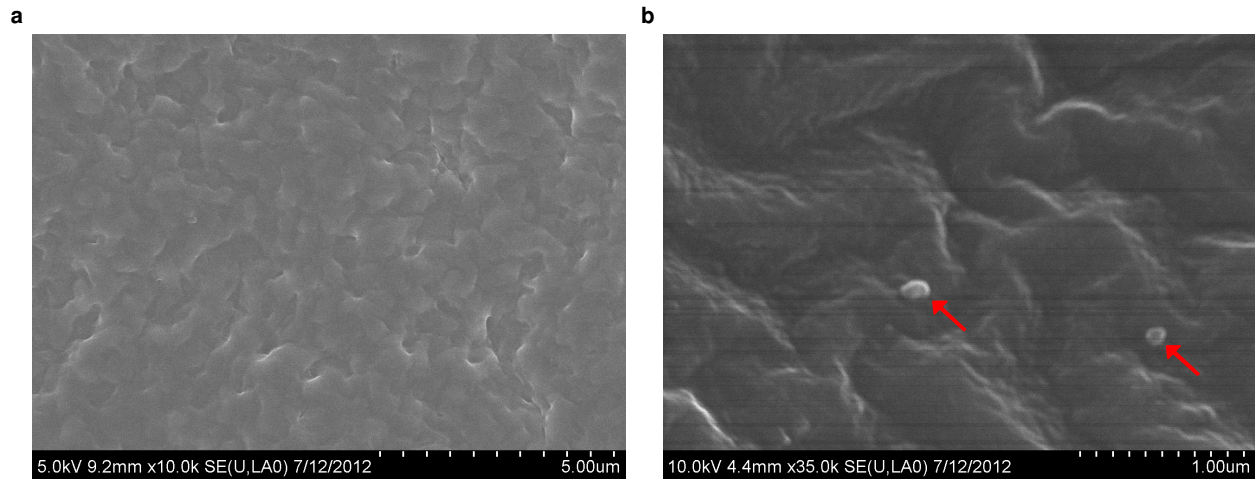

**Figure S2.** SEM images of **a)** HEMA contact lens and **b)** ND-nanogel embedded contact lens at higher magnification. ND-nanogels of approximately 100 nm size were observed on the surface of contact lenses (red arrows).

**Figure S3**

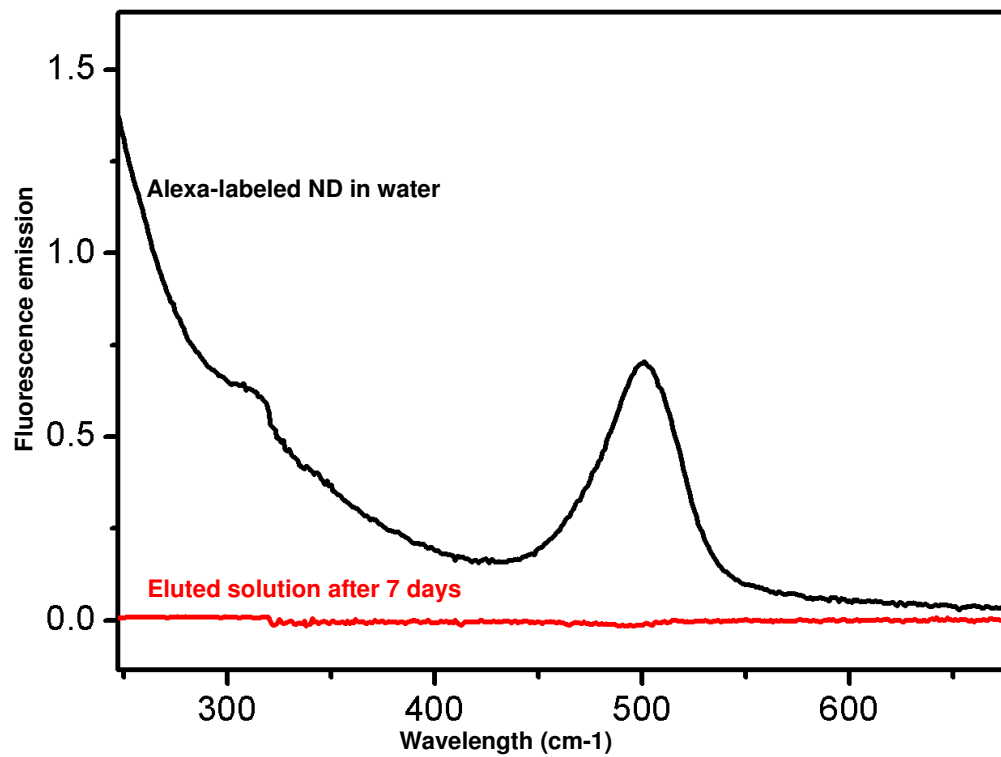

**Figure S3.** Fluorescence spectral scan of Alexa Fluor® 488-labeled ND in water (black) and eluted solution from ND-nanogel lens over 7 days in lysozyme solution (red). Negligible fluorescence level was detected in the elution after 7 days, indicating an absence of NDs.
